# Supplementary material for: Deletion of FNDC5/irisin modifies murine osteocyte function in a sex-specific manner
Source: eLife. 2024 Apr 25;12:RP92263. doi: 10.7554/eLife.92263 (PMC11045224; doi:10.7554/eLife.92263)
Supplement: Supplementary file 4. — Genes that are significantly differentially expressed in low-calcium diet-fed female FNDC5 KO mice compared to low-calcium diet-fed female WT mice as well as genes that are significantly differentially expressed in low-calcium diet-fed male FNDC5 KO mice compared to low-calcium diet-fed male WT mice are listed. [file elife-92263-supp4.xlsx]

## Sheet: Female KO lc vs Female WT lc
Female KO lc vs Female WT lc osteocyte genes
SYMBOL	GENENAME	log2FoldChange	padj
Ddx3y	DEAD box helicase 3, Y-linked	7.29466	0.0818683
Uty	ubiquitously transcribed tetratricopeptide repeat containing, Y-linked	7.1972	0.0972042
Gm14461	predicted gene 14461	5.21644	NA
Capn11	calpain 11	4.55768	NA
Serpina3n	serine (or cysteine) peptidase inhibitor, clade A, member 3N	2.08725	2.55334e-06
Cbln1	cerebellin 1 precursor protein	1.95338	NA
Gpnmb	glycoprotein (transmembrane) nmb	1.90891	5.2404e-06
Nhlrc4	NHL repeat containing 4	1.75928	NA
Lgals12	lectin, galactose binding, soluble 12	1.38552	NA
Myo15	NA	1.35862	NA
Erdr1	erythroid differentiation regulator 1	1.34002	3.20416e-05
Cyp2f2	cytochrome P450, family 2, subfamily f, polypeptide 2	1.21418	0.0477559
Hif3a	hypoxia inducible factor 3, alpha subunit	1.17984	NA
Snora30	small nucleolar RNA, H/ACA box 30	1.15686	NA
Cd163	CD163 antigen	1.14016	0.114593
Prokr1	prokineticin receptor 1	1.11081	0.00949026
Asprv1	aspartic peptidase, retroviral-like 1	1.1012	0.000801223
Aunip	aurora kinase A and ninein interacting protein	1.08398	0.0558322
Plin4	perilipin 4	1.05105	0.0148641
Angptl1	angiopoietin-like 1	1.04498	NA
Slc35e4	solute carrier family 35, member E4	-1.00044	0.0860708
Fbn2	fibrillin 2	-1.00094	0.034877
Nr1d1	nuclear receptor subfamily 1, group D, member 1	-1.00111	0.0441223
Col8a1	collagen, type VIII, alpha 1	-1.00168	0.000481046
Gzmb	granzyme B	-1.0043	NA
Twist1	twist basic helix-loop-helix transcription factor 1	-1.00939	0.065745
Csrnp3	cysteine-serine-rich nuclear protein 3	-1.01202	0.0441223
Nhsl1	NHS-like 1	-1.0124	0.00125778
Plcd1	phospholipase C, delta 1	-1.01297	0.0120952
Pdk4	pyruvate dehydrogenase kinase, isoenzyme 4	-1.01312	0.0447318
Pi15	peptidase inhibitor 15	-1.01461	0.0248133
Lox	lysyl oxidase	-1.02219	0.00125778
Mamdc2	MAM domain containing 2	-1.02288	0.0848642
Col6a3	collagen, type VI, alpha 3	-1.0264	0.00869545
Col24a1	collagen, type XXIV, alpha 1	-1.02652	0.0102564
Col6a1	collagen, type VI, alpha 1	-1.03241	0.00281387
Col12a1	collagen, type XII, alpha 1	-1.03371	0.000592736
Sparc	secreted acidic cysteine rich glycoprotein	-1.03547	0.000466824
Timp1	tissue inhibitor of metalloproteinase 1	-1.04029	0.0180009
Cybrd1	cytochrome b reductase 1	-1.04177	0.142129
Col13a1	collagen, type XIII, alpha 1	-1.04385	0.0139823
Chn1	chimerin 1	-1.04461	0.0095176
Piezo2	piezo-type mechanosensitive ion channel component 2	-1.04618	0.149099
Pycr1	pyrroline-5-carboxylate reductase 1	-1.04832	0.0591223
Arfgef3	ARFGEF family member 3	-1.0501	0.151576
Gpx8	glutathione peroxidase 8 (putative)	-1.0512	0.0688691
Ube2ql1	ubiquitin-conjugating enzyme E2Q family-like 1	-1.05286	0.0491932
Sfrp4	secreted frizzled-related protein 4	-1.05952	0.0984644
Itga10	integrin, alpha 10	-1.06328	0.00154271
Rerg	RAS-like, estrogen-regulated, growth-inhibitor	-1.06407	0.0104923
Creb3l1	cAMP responsive element binding protein 3-like 1	-1.06784	0.00411222
Ndrg4	N-myc downstream regulated gene 4	-1.06837	0.15622
Epha3	Eph receptor A3	-1.0691	0.0135442
Frmd6	FERM domain containing 6	-1.07015	0.00625562
Anxa8	annexin A8	-1.07015	0.0527927
D8Ertd82e	NA	-1.07201	0.104851
Ctgf	NA	-1.07828	4.92046e-05
Postn	periostin, osteoblast specific factor	-1.08001	5.63433e-05
Slc2a10	solute carrier family 2 (facilitated glucose transporter), member 10	-1.0834	0.0232577
Ocstamp	osteoclast stimulatory transmembrane protein	-1.08501	0.144859
Gxylt2	glucoside xylosyltransferase 2	-1.08613	0.000542755
Rhbdl2	rhomboid like 2	-1.08676	0.151767
Col1a2	collagen, type I, alpha 2	-1.09175	0.000254084
Dll1	delta like canonical Notch ligand 1	-1.09467	0.142129
Msi1	musashi RNA-binding protein 1	-1.09758	0.0497044
Efs	embryonal Fyn-associated substrate	-1.09846	0.0651444
Csdc2	cold shock domain containing C2, RNA binding	-1.09918	0.0683288
Lpar3	lysophosphatidic acid receptor 3	-1.10275	0.0497044
Slc8a3	solute carrier family 8 (sodium/calcium exchanger), member 3	-1.10659	4.65412e-05
Col6a2	collagen, type VI, alpha 2	-1.11283	0.00107622
Kcnk2	potassium channel, subfamily K, member 2	-1.11388	0.0347045
Col5a2	collagen, type V, alpha 2	-1.11885	0.000582167
Col11a2	collagen, type XI, alpha 2	-1.11953	0.00210964
Zfp580	zinc finger protein 580	-1.11981	NA
Cxcl1	chemokine (C-X-C motif) ligand 1	-1.13623	0.0617015
Zfp9	zinc finger protein 9	-1.13994	0.013107
Lipc	lipase, hepatic	-1.14186	0.0245965
Gbp6	guanylate binding protein 6	-1.15072	0.0379767
Serpinf1	serine (or cysteine) peptidase inhibitor, clade F, member 1	-1.15426	0.000210066
Col1a1	collagen, type I, alpha 1	-1.15565	0.000195106
Mtcl1	microtubule crosslinking factor 1	-1.15924	NA
Npnt	nephronectin	-1.16555	0.0567107
Loxl4	lysyl oxidase-like 4	-1.16643	4.92046e-05
Pdpn	podoplanin	-1.16971	0.0925428
Fras1	Fraser extracellular matrix complex subunit 1	-1.17184	0.116292
Cemip	cell migration inducing protein, hyaluronan binding	-1.17679	0.000304536
Mustn1	musculoskeletal, embryonic nuclear protein 1	-1.18122	0.0988061
Col2a1	collagen, type II, alpha 1	-1.18606	0.00625562
Ifitm5	interferon induced transmembrane protein 5	-1.18786	0.00431348
Inhbb	inhibin beta-B	-1.19024	0.0588354
Prss35	protease, serine 35	-1.19388	0.0285326
Alpl	alkaline phosphatase, liver/bone/kidney	-1.19741	0.000210066
Cacnb3	calcium channel, voltage-dependent, beta 3 subunit	-1.19915	0.000433637
Mmp15	matrix metallopeptidase 15	-1.20072	NA
Hapln4	hyaluronan and proteoglycan link protein 4	-1.20655	NA
Col11a1	collagen, type XI, alpha 1	-1.21158	0.00233625
Foxc2	forkhead box C2	-1.21592	0.0177308
Tmem255a	transmembrane protein 255A	-1.21912	NA
Unc5c	unc-5 netrin receptor C	-1.22276	0.00598489
Rnf182	ring finger protein 182	-1.23509	NA
Mical2	microtubule associated monooxygenase, calponin and LIM domain containing 2	-1.2373	0.000282942
Fhod3	formin homology 2 domain containing 3	-1.23924	0.000217958
Entpd3	ectonucleoside triphosphate diphosphohydrolase 3	-1.24576	0.00177601
Camk2b	calcium/calmodulin-dependent protein kinase II, beta	-1.24874	NA
Bglap	bone gamma carboxyglutamate protein	-1.2628	0.00119441
Lrrc75b	leucine rich repeat containing 75B	-1.26476	NA
Panx3	pannexin 3	-1.29045	0.0683288
Slc13a5	solute carrier family 13 (sodium-dependent citrate transporter), member 5	-1.29335	0.0104714
Ephb2	Eph receptor B2	-1.30266	0.0170369
Cgref1	cell growth regulator with EF hand domain 1	-1.30339	3.20416e-05
Frzb	frizzled-related protein	-1.30547	NA
Creb5	cAMP responsive element binding protein 5	-1.30927	0.0256626
Tnfrsf12a	tumor necrosis factor receptor superfamily, member 12a	-1.31094	0.073489
Shc2	SHC (Src homology 2 domain containing) transforming protein 2	-1.31279	0.00189188
Aldh1l2	aldehyde dehydrogenase 1 family, member L2	-1.31324	0.00210964
Asap3	ArfGAP with SH3 domain, ankyrin repeat and PH domain 3	-1.31508	NA
Gm13889	predicted gene 13889	-1.36307	0.0609844
Loxl2	lysyl oxidase-like 2	-1.38663	0.002674
B630019K06Rik	F-box and leucine-rich repeat protein 17 pseudogene	-1.38715	NA
Tnfsf11	tumor necrosis factor (ligand) superfamily, member 11	-1.40167	3.20416e-05
Zfp385b	zinc finger protein 385B	-1.40252	NA
Sgca	sarcoglycan, alpha (dystrophin-associated glycoprotein)	-1.41017	NA
Cthrc1	collagen triple helix repeat containing 1	-1.41645	4.92046e-05
Colgalt2	collagen beta(1-O)galactosyltransferase 2	-1.4564	NA
Cyr61	NA	-1.461	7.41983e-16
Sphkap	SPHK1 interactor, AKAP domain containing	-1.46519	NA
Fam26e	NA	-1.46588	NA
Rasl11a	RAS-like, family 11, member A	-1.48461	0.00160778
Slc9a2	solute carrier family 9 (sodium/hydrogen exchanger), member 2	-1.49002	0.0452832
Creb3l3	cAMP responsive element binding protein 3-like 3	-1.52701	NA
Lmcd1	LIM and cysteine-rich domains 1	-1.53488	0.011105
Csf3	colony stimulating factor 3 (granulocyte)	-1.54503	0.117939
Tfpi2	tissue factor pathway inhibitor 2	-1.59025	0.00464264
Cpz	carboxypeptidase Z	-1.6258	4.92046e-05
St8sia2	ST8 alpha-N-acetyl-neuraminide alpha-2,8-sialyltransferase 2	-1.64522	NA
Gpr3	G-protein coupled receptor 3	-1.70059	0.0855003
Fcrls	Fc receptor-like S, scavenger receptor	-1.70843	NA
Npas2	neuronal PAS domain protein 2	-1.71002	NA
Lingo3	leucine rich repeat and Ig domain containing 3	-1.73957	NA
Plat	plasminogen activator, tissue	-1.76174	0.00219322
Hhip	Hedgehog-interacting protein	-1.99973	NA
Wnt2b	wingless-type MMTV integration site family, member 2B	-2.02455	NA
Lppr4	NA	-2.12301	NA
Lppr5	NA	-2.19408	NA
Sdcbp2	syndecan binding protein (syntenin) 2	-2.88378	NA
Cnn1	calponin 1	-2.89156	NA
Aloxe3	arachidonate lipoxygenase 3	-3.06935	NA
Neu2	neuraminidase 2	-3.18086	NA
Sec1	secretory blood group 1	-3.50859	NA
Cyp2e1	cytochrome P450, family 2, subfamily e, polypeptide 1	-3.75852	NA
Apob	apolipoprotein B	-3.89538	NA
Grhl3	grainyhead like transcription factor 3	-5.52473	NA
Zcchc5	NA	-5.57289	NA
Plg	plasminogen	-5.94162	NA
Asphd2	aspartate beta-hydroxylase domain containing 2	-5.94415	NA
Isl2	insulin related protein 2 (islet 2)	-5.95861	NA
1700088E04Rik	RIKEN cDNA 1700088E04 gene	-6.10727	NA
Pzp	PZP, alpha-2-macroglobulin like	-7.3207	NA
Alb	albumin	-8.57246	NA

## Sheet: Male KO lc vs Male WT lc 
Male KO lc vs Male WT lc osteocyte genes
SYMBOL	GENENAME	log2FoldChange	padj
F2	coagulation factor II	3.41544	0.819298
3830403N18Rik	RIKEN cDNA 3830403N18 gene	2.00731	0.259941
Snord71	small nucleolar RNA, C/D box 71	1.96928	0.697861
Pakap	paralemmin A kinase anchor protein	1.45082	0.869128
Lurap1l	leucine rich adaptor protein 1-like	1.44138	0.318185
Oas1g	2'-5' oligoadenylate synthetase 1G	1.43208	0.575993
Gsg1l	GSG1-like	1.31022	0.451977
Lama1	laminin, alpha 1	1.2606	0.107769
Krt81	keratin 81	1.234	0.709316
Oas2	2'-5' oligoadenylate synthetase 2	1.00827	0.0046386
C030034L19Rik	RIKEN cDNA C030034L19 gene	-1.01532	0.808724
Cxcl5	chemokine (C-X-C motif) ligand 5	-1.02146	0.00169504
Jchain	immunoglobulin joining chain	-1.03889	1.54403e-11
Cxcl9	chemokine (C-X-C motif) ligand 9	-1.09646	0.000745116
P4htm	prolyl 4-hydroxylase, transmembrane (endoplasmic reticulum)	-1.11086	0.561247
Kcna1	potassium voltage-gated channel, shaker-related subfamily, member 1	-1.15075	0.819298
Npas2	neuronal PAS domain protein 2	-1.16739	0.01744
Apod	apolipoprotein D	-1.19149	0.318185
Fndc1	fibronectin type III domain containing 1	-1.22757	0.016909
Dkk3	dickkopf WNT signaling pathway inhibitor 3	-1.2422	0.00342818
Gm8439	predicted gene 8439	-1.25672	0.770189
Col3a1	collagen, type III, alpha 1	-1.27639	0.394016
Medag	mesenteric estrogen dependent adipogenesis	-1.33203	0.196096
A2m	alpha-2-macroglobulin	-1.37039	0.080792
Lancl3	LanC lantibiotic synthetase component C-like 3 (bacterial)	-1.37352	0.175325
Ecm2	extracellular matrix protein 2, female organ and adipocyte specific	-1.37744	4.14021e-05
Igfbp6	insulin-like growth factor binding protein 6	-1.41606	0.564771
Lypd6	LY6/PLAUR domain containing 6	-1.4388	0.439426
Nov	NA	-1.48063	0.196096
Angptl1	angiopoietin-like 1	-1.49964	0.00788311
Cntfr	ciliary neurotrophic factor receptor	-1.54266	0.246525
Pgm5	phosphoglucomutase 5	-1.65228	0.307195
Thbs2	thrombospondin 2	-1.77724	1.15207e-14
Itgbl1	integrin, beta-like 1	-1.78859	0.504724
Col8a2	collagen, type VIII, alpha 2	-1.79624	0.0366543
Comp	cartilage oligomeric matrix protein	-1.89039	5.61876e-13
Ssc5d	scavenger receptor cysteine rich family, 5 domains	-2.0107	0.00480529
Tnxb	tenascin XB	-2.01196	0.0436727
Wnt16	wingless-type MMTV integration site family, member 16	-2.05135	0.0619156
Dpt	dermatopontin	-2.06676	0.566687
Sfrp2	secreted frizzled-related protein 2	-2.11952	0.0901491
Fmod	fibromodulin	-2.29533	0.0192866
Sema3c	sema domain, immunoglobulin domain (Ig), short basic domain, secreted, (semaphorin) 3C	-2.45311	0.0492582
Lrrc15	leucine rich repeat containing 15	-2.61094	2.50153e-05
Angptl7	angiopoietin-like 7	-2.63758	0.00342818
Acan	aggrecan	-2.80765	0.011832
Gabra4	gamma-aminobutyric acid (GABA) A receptor, subunit alpha 4	-2.90329	0.378767
Six2	sine oculis-related homeobox 2	-2.93619	0.0924696
Chad	chondroadherin	-2.94524	1.51102e-20
Tnn	tenascin N	-3.3782	5.76348e-05
Aspn	asporin	-3.68548	2.04366e-09
Prg4	proteoglycan 4 (megakaryocyte stimulating factor, articular superficial zone protein)	-3.80891	4.45879e-19
Xist	inactive X specific transcripts	-3.93872	0.0346446
Myoc	myocilin	-4.30581	0.437393
Nrg3	neuregulin 3	-4.76737	0.681871
Wdr54	WD repeat domain 54	-4.79451	0.746553
Ptx4	pentraxin 4	-4.82468	0.647775
Clec3a	C-type lectin domain family 3, member a	-6.2853	3.17045e-07
C1qtnf3	C1q and tumor necrosis factor related protein 3	-7.04826	0.000370211
